# Supplementary material for: Development of a Genus-Universal Nucleotide Signature for the Identification and Supervision of Ephedra-Containing Products
Source: MDPI journal article supplement (doi:10.3390/molecules27072342), 2022-04-06
Supplement: s1 [file s1]

## ***Supplementary Materials:***

### **Supplementary Tables:**

**Table S1.** Information of the 224 ITS2 sequences of *Ephedra* downloaded from GenBank.

### **Supplementary Figures:**

**Figure S1.** BLAST results in NCBI of the sequence S1.

**Figure S2.** BLAST results in NCBI of the sequence S2.

**Figure S3.** BLAST results in NCBI of the sequence S3.

**Figure S4.** BLAST results in NCBI of the sequence S4.

**Figure S5.** BLAST results in NCBI of the sequence S5.

**Figure S6.** BLAST results in NCBI of the sequence S7.

**Figure S7.** BLAST results in NCBI of the nucleotide signature of *Ephedra* L.

**Table S1**

| No. | Species                                          | GenBank accession                                                                                         |
|-----|--------------------------------------------------|-----------------------------------------------------------------------------------------------------------|
| 1   | <i>Ephedra alata</i>                             | MH547540                                                                                                  |
| 2   | <i>Ephedra altissima</i>                         | AY755772-73                                                                                               |
| 3   | <i>Ephedra americana</i>                         | GU968545, GU968567, KP788809                                                                              |
| 4   | <i>Ephedra antisiphilitica</i>                   | AY755757, KP788810                                                                                        |
| 5   | <i>Ephedra aphylla</i>                           | AY755771, KP788811, MG569946, GU968544、52、69                                                              |
| 6   | <i>Ephedra aspera</i>                            | KP788812-13                                                                                               |
| 7   | <i>Ephedra boelckei</i>                          | KP788814                                                                                                  |
| 8   | <i>Ephedra botschantzevii</i>                    | GU968565                                                                                                  |
| 9   | <i>Ephedra breana</i>                            | KP788815                                                                                                  |
| 10  | <i>Ephedra californica</i>                       | AY755750, KP788816                                                                                        |
| 11  | <i>Ephedra chilensis</i>                         | AY755754、67, KP788817                                                                                     |
| 12  | <i>Ephedra ciliata</i>                           | AY755776, GU968548                                                                                        |
| 13  | <i>Ephedra compacta</i>                          | KP788818-19                                                                                               |
| 14  | <i>Ephedra coryi</i>                             | KP788820-21                                                                                               |
| 15  | <i>Ephedra cutleri</i>                           | KP788822                                                                                                  |
| 16  | <i>Ephedra dahurica</i>                          | GU186923、81-83, JQ726575                                                                                  |
| 17  | <i>Ephedra distachya</i>                         | AY755761、69, FJ958013, GU186924、68、71、73-74、76-78、83-84、93, KX779084, KP788823                            |
| 18  | <i>Ephedra distachya</i> subsp. <i>helvetica</i> | JQ726579                                                                                                  |
| 19  | <i>Ephedra equisetina</i>                        | AY394065, AY755740、51、70, GQ434578-79, GU968572, KP788824, KX675037-39, KX779079-82, MF096243-48          |
| 20  | <i>Ephedra fedtschenkoae</i>                     | KX779072                                                                                                  |
| 21  | <i>Ephedra foeminea</i>                          | FJ958007, GU290485, GU968546、51, KP788808、25                                                              |
| 22  | <i>Ephedra foliata</i>                           | AY755775, FJ958008-09                                                                                     |
| 23  | <i>Ephedra fragilis</i>                          | AY755752, FJ958014                                                                                        |
| 24  | <i>Ephedra frustillata</i>                       | AY755743、48, KP788826                                                                                     |
| 25  | <i>Ephedra funerea</i>                           | KP788827-28                                                                                               |
| 26  | <i>Ephedra gerardiana</i>                        | AY394067, AY755745、53、60                                                                                  |
| 27  | <i>Ephedra gracilis</i>                          | KP788829                                                                                                  |
| 28  | <i>Ephedra intermedia</i>                        | AY394062, AY755741、58, GU968563, KP788830, KX675040-42, KX779076、87-88, MF096249-51、53-55, MH258138、80-83 |
| 29  | <i>Ephedra intermedia</i> var. <i>tibetica</i>   | KX779085                                                                                                  |
| 30  | <i>Ephedra likiangensis</i>                      | AY394068, AY755739、66, GU968547, KP788831, MF972970, JQ726581                                             |
| 31  | <i>Ephedra lomatolepis</i>                       | FJ958006, GU290484, GU968562、64, JQ726585-86, KX779083                                                    |
| 32  | <i>Ephedra major</i>                             | AY755778, FJ958003                                                                                        |
| 33  | <i>Ephedra major</i> subsp. <i>major</i>         | FJ958012, GU968557                                                                                        |
| 34  | <i>Ephedra major</i> subsp. <i>procera</i>       | AY755763, FJ958011, GU968554-56、59, JQ726580、90, MG256238                                                 |
| 35  | <i>Ephedra minuta</i>                            | AY394069, AY755742、55-56、JQ726582                                                                         |
| 36  | <i>Ephedra monosperma</i>                        | AY394066, AY755746, GU968560, KP788832, KX779073-75                                                       |
| 37  | <i>Ephedra multiflora</i>                        | KP788833                                                                                                  |
| 38  | <i>Ephedra nevadensis</i>                        | AY755764                                                                                                  |

|    |                                          |                                                                                                                             |
|----|------------------------------------------|-----------------------------------------------------------------------------------------------------------------------------|
| 39 | <i>Ephedra ochreata</i>                  | KP788834-35                                                                                                                 |
| 40 | <i>Ephedra pachyclada</i>                | AY755779, MG569945                                                                                                          |
| 41 | <i>Ephedra pedunculata</i>               | GU968561, KP788836                                                                                                          |
| 42 | <i>Ephedra przewalskii</i>               | AY394064, AY730605-06, JQ726588, KX779077-78                                                                                |
| 43 | <i>Ephedra pseudodistachya</i>           | JQ726587、89, JQ726592                                                                                                       |
| 44 | <i>Ephedra regeliana</i>                 | AY730607, KX779086                                                                                                          |
| 45 | <i>Ephedra rhytidosperma</i>             | DQ028782, DQ212958                                                                                                          |
| 46 | <i>Ephedra rupestris</i>                 | AY755765, KP788837                                                                                                          |
| 47 | <i>Ephedra sarcocarpa</i>                | FJ958017                                                                                                                    |
| 48 | <i>Ephedra saxatilis</i>                 | FJ958022, MF785606, MN861080                                                                                                |
| 49 | <i>Ephedra sinica</i>                    | AY394063, AY755747、49, GQ865704, GU186922, GU968550, JF421494, KP788838, KX675043-45, KX779071, MF096252、56-60, MF972965-69 |
| 50 | <i>Ephedra sinica</i> var. <i>pumila</i> | GU968566                                                                                                                    |
| 51 | <i>Ephedra somalensis</i>                | FJ958004                                                                                                                    |
| 52 | <i>Ephedra strobilacea</i>               | FJ958018                                                                                                                    |
| 53 | <i>Ephedra tilhoana</i>                  | JQ726591                                                                                                                    |
| 54 | <i>Ephedra torreyana</i>                 | AY755759, KP788839                                                                                                          |
| 55 | <i>Ephedra transitoria</i>               | FJ958021                                                                                                                    |
| 56 | <i>Ephedra triandra</i>                  | KP788840                                                                                                                    |
| 57 | <i>Ephedra trifurca</i>                  | AY755762, KP788841                                                                                                          |
| 58 | <i>Ephedra tweediana</i>                 | AY755768, KP788842                                                                                                          |
| 59 | <i>Ephedra viridis</i>                   | FJ958005, KP788843                                                                                                          |
| 60 | <i>Ephedra</i> sp.                       | FJ958023, MH732928                                                                                                          |

# Figure S1

|   | Description                                                                                                                                                                                                                   | Max Score | Total Score | Query Cover | E value | Per. Ident | Acc. Len | Accession                  |
|---|-------------------------------------------------------------------------------------------------------------------------------------------------------------------------------------------------------------------------------|-----------|-------------|-------------|---------|------------|----------|----------------------------|
| ✓ | <a href="#">Ehnedra likiangensis voucher LJ01 internal transcribed spacer 2, partial sequence</a>                                                                                                                             | 102       | 102         | 100%        | 1e-18   | 100.00%    | 246      | <a href="#">MF972970.1</a> |
| ✓ | <a href="#">Ehnedra sinica voucher CM04 internal transcribed spacer 2, partial sequence</a>                                                                                                                                   | 102       | 102         | 100%        | 1e-18   | 100.00%    | 261      | <a href="#">MF972969.1</a> |
| ✓ | <a href="#">Ehnedra sinica voucher CM03 internal transcribed spacer 2, partial sequence</a>                                                                                                                                   | 102       | 102         | 100%        | 1e-18   | 100.00%    | 261      | <a href="#">MF972968.1</a> |
| ✓ | <a href="#">Ehnedra sinica voucher CM01 internal transcribed spacer 2, partial sequence</a>                                                                                                                                   | 102       | 102         | 100%        | 1e-18   | 100.00%    | 261      | <a href="#">MF972967.1</a> |
| ✓ | <a href="#">Ehnedra sinica voucher CM05 internal transcribed spacer 2, partial sequence</a>                                                                                                                                   | 102       | 102         | 100%        | 1e-18   | 100.00%    | 261      | <a href="#">MF972966.1</a> |
| ✓ | <a href="#">Ehnedra sinica voucher CM02 internal transcribed spacer 2, partial sequence</a>                                                                                                                                   | 102       | 102         | 100%        | 1e-18   | 100.00%    | 261      | <a href="#">MF972965.1</a> |
| ✓ | <a href="#">Ehnedra major subsp. procera voucher 823-12-2014 5.8S ribosomal RNA gene, partial sequence; internal transcribed spacer 2, complete sequence</a>                                                                  | 102       | 102         | 100%        | 1e-18   | 100.00%    | 331      | <a href="#">MG256238.1</a> |
| ✓ | <a href="#">Ehnedra aphylla voucher SCUI-E13 5.8S ribosomal RNA gene, partial sequence; internal transcribed spacer 2, complete sequence</a>                                                                                  | 102       | 102         | 100%        | 1e-18   | 100.00%    | 356      | <a href="#">MG568946.1</a> |
| ✓ | <a href="#">Ehnedra intermedia isolate XZZMH4 internal transcribed spacer 2, complete sequence</a>                                                                                                                            | 102       | 102         | 100%        | 1e-18   | 100.00%    | 251      | <a href="#">MH258183.1</a> |
| ✓ | <a href="#">Ehnedra intermedia isolate XZZMH3 internal transcribed spacer 2, complete sequence</a>                                                                                                                            | 102       | 102         | 100%        | 1e-18   | 100.00%    | 251      | <a href="#">MH258182.1</a> |
| ✓ | <a href="#">Ehnedra intermedia isolate XZZMH2 internal transcribed spacer 2, complete sequence</a>                                                                                                                            | 102       | 102         | 100%        | 1e-18   | 100.00%    | 251      | <a href="#">MH258181.1</a> |
| ✓ | <a href="#">Ehnedra intermedia isolate XZZMH1 internal transcribed spacer 2, complete sequence</a>                                                                                                                            | 102       | 102         | 100%        | 1e-18   | 100.00%    | 251      | <a href="#">MH258180.1</a> |
| ✓ | <a href="#">Ehnedra intermedia isolate XZZMH internal transcribed spacer 2, complete sequence</a>                                                                                                                             | 102       | 102         | 100%        | 1e-18   | 100.00%    | 251      | <a href="#">MH258138.1</a> |
| ✓ | <a href="#">Ehnedra alata isolate UQU ALP192 5.8S ribosomal RNA gene, partial sequence; internal transcribed spacer 2, complete sequence; internal transcribed spacer 1, partial sequence</a>                                 | 102       | 102         | 100%        | 1e-18   | 100.00%    | 522      | <a href="#">MH547540.1</a> |
| ✓ | <a href="#">Ehnedra sp. KSR-2018 isolate KSR-0024 5.8S ribosomal RNA gene and internal transcribed spacer 2, partial sequence</a>                                                                                             | 102       | 102         | 100%        | 1e-18   | 100.00%    | 365      | <a href="#">MH732928.1</a> |
| ✓ | <a href="#">Ehnedra sinica isolate KPS0082A03 internal transcribed spacer 2, partial sequence</a>                                                                                                                             | 102       | 102         | 100%        | 1e-18   | 100.00%    | 251      | <a href="#">MF096260.1</a> |
| ✓ | <a href="#">Ehnedra sinica isolate KPS0082A02 internal transcribed spacer 2, partial sequence</a>                                                                                                                             | 102       | 102         | 100%        | 1e-18   | 100.00%    | 251      | <a href="#">MF096259.1</a> |
| ✓ | <a href="#">Ehnedra sinica isolate KPS0082A01 internal transcribed spacer 2, partial sequence</a>                                                                                                                             | 102       | 102         | 100%        | 1e-18   | 100.00%    | 251      | <a href="#">MF096258.1</a> |
| ✓ | <a href="#">Ehnedra sinica isolate KMS0082A03 internal transcribed spacer 2, partial sequence</a>                                                                                                                             | 102       | 102         | 100%        | 1e-18   | 100.00%    | 251      | <a href="#">MF096257.1</a> |
| ✓ | <a href="#">Ehnedra somalensis voucher Thulin 10925A (UPS) internal transcribed spacer 1, partial sequence; 5.8S ribosomal RNA gene and internal transcribed spacer 2, partial sequence</a>                                   | 97.1      | 97.1        | 100%        | 6e-17   | 98.18%     | 1586     | <a href="#">FJ958004.1</a> |
| ✓ | <a href="#">Ehnedra distachya internal transcribed spacer 2, partial sequence</a>                                                                                                                                             | 97.1      | 97.1        | 100%        | 6e-17   | 98.18%     | 246      | <a href="#">GU186924.1</a> |
| ✓ | <a href="#">Ehnedra pachyclada voucher (S) C-7844 18S ribosomal RNA gene, partial sequence; internal transcribed spacer 1, 5.8S ribosomal RNA gene, partial sequence; internal transcribed spacer 2, partial sequence</a>     | 97.1      | 97.1        | 100%        | 6e-17   | 98.18%     | 1658     | <a href="#">AY755779.1</a> |
| ✓ | <a href="#">Ehnedra distachya voucher (S) 03-684 18S ribosomal RNA gene, partial sequence; internal transcribed spacer 1, 5.8S ribosomal RNA gene, partial sequence; internal transcribed spacer 2, partial sequence</a>      | 97.1      | 97.1        | 100%        | 6e-17   | 98.18%     | 1675     | <a href="#">AY755769.1</a> |
| ✓ | <a href="#">Ehnedra distachya voucher (S) 04-481 18S ribosomal RNA gene, partial sequence; internal transcribed spacer 1, 5.8S ribosomal RNA gene, partial sequence; internal transcribed spacer 2, partial sequence</a>      | 97.1      | 97.1        | 100%        | 6e-17   | 98.18%     | 1675     | <a href="#">AY755761.1</a> |
| ✓ | <a href="#">Ehnedra equisetina voucher (S) 03-928 18S ribosomal RNA gene, partial sequence; internal transcribed spacer 1, 5.8S ribosomal RNA gene, partial sequence; internal transcribed spacer 2, partial sequence</a>     | 97.1      | 97.1        | 100%        | 6e-17   | 98.18%     | 1659     | <a href="#">AY755740.1</a> |
| ✓ | <a href="#">Ehnedra trifurca voucher Reina-G. &amp; Van Devender 96-208 (MEXU) 18S ribosomal RNA gene, partial sequence; internal transcribed spacer 1, partial sequence; internal transcribed spacer 2, partial sequence</a> | 95.3      | 95.3        | 98%         | 2e-16   | 98.15%     | 1657     | <a href="#">KP788841.1</a> |
| ✓ | <a href="#">Ehnedra californica voucher Little &amp; Ochoterena 793 (MEXU) 18S ribosomal RNA gene, partial sequence; internal transcribed spacer 1, partial sequence; internal transcribed spacer 2, partial sequence</a>     | 95.3      | 95.3        | 98%         | 2e-16   | 98.15%     | 1658     | <a href="#">KP788816.1</a> |
| ✓ | <a href="#">Ehnedra foeminea internal transcribed spacer 1, partial sequence; 5.8S ribosomal RNA gene and internal transcribed spacer 2, complete sequence; internal transcribed spacer 1, partial sequence</a>               | 95.3      | 95.3        | 100%        | 2e-16   | 98.18%     | 1563     | <a href="#">KP788808.1</a> |
| ✓ | <a href="#">Ehnedra trifurca voucher (Mo) 04630447 18S ribosomal RNA gene, partial sequence; internal transcribed spacer 1, 5.8S ribosomal RNA gene, partial sequence; internal transcribed spacer 2, partial sequence</a>    | 95.3      | 95.3        | 98%         | 2e-16   | 98.15%     | 1658     | <a href="#">AY755762.1</a> |
| ✓ | <a href="#">Ehnedra gerardiana voucher (E) E00130259 18S ribosomal RNA gene, partial sequence; internal transcribed spacer 1, 5.8S ribosomal RNA gene, partial sequence; internal transcribed spacer 2, partial sequence</a>  | 95.3      | 95.3        | 100%        | 2e-16   | 96.36%     | 1658     | <a href="#">AY755753.1</a> |
| ✓ | <a href="#">Ehnedra californica voucher (O) 68-154 18S ribosomal RNA gene, partial sequence; internal transcribed spacer 1, 5.8S ribosomal RNA gene, partial sequence; internal transcribed spacer 2, partial sequence</a>    | 95.3      | 95.3        | 98%         | 2e-16   | 98.15%     | 1659     | <a href="#">AY755750.1</a> |

**Figure S2**

|   | Description                                                                                                                                            | Max Score | Total Score | Query Cover | E value | Per. Ident | Acc. Len | Accession                  |
|---|--------------------------------------------------------------------------------------------------------------------------------------------------------|-----------|-------------|-------------|---------|------------|----------|----------------------------|
| ✓ | <a href="#">Ephedra likiangensis voucher LJ01 internal transcribed spacer 2, partial sequence</a>                                                      | 84.2      | 84.2        | 100%        | 3e-13   | 100.00%    | 246      | <a href="#">MF972970.1</a> |
| ✓ | <a href="#">Ephedra sinica voucher CM04 internal transcribed spacer 2, partial sequence</a>                                                            | 84.2      | 84.2        | 100%        | 3e-13   | 100.00%    | 261      | <a href="#">MF972969.1</a> |
| ✓ | <a href="#">Ephedra sinica voucher CM03 internal transcribed spacer 2, partial sequence</a>                                                            | 84.2      | 84.2        | 100%        | 3e-13   | 100.00%    | 261      | <a href="#">MF972968.1</a> |
| ✓ | <a href="#">Ephedra sinica voucher CM01 internal transcribed spacer 2, partial sequence</a>                                                            | 84.2      | 84.2        | 100%        | 3e-13   | 100.00%    | 261      | <a href="#">MF972967.1</a> |
| ✓ | <a href="#">Ephedra sinica voucher CM05 internal transcribed spacer 2, partial sequence</a>                                                            | 84.2      | 84.2        | 100%        | 3e-13   | 100.00%    | 261      | <a href="#">MF972966.1</a> |
| ✓ | <a href="#">Ephedra sinica voucher CM02 internal transcribed spacer 2, partial sequence</a>                                                            | 84.2      | 84.2        | 100%        | 3e-13   | 100.00%    | 261      | <a href="#">MF972965.1</a> |
| ✓ | <a href="#">Ephedra major subsp. procera voucher 823-12-2014 5.8S ribosomal RNA gene, partial sequence; internal transcribed spacer 2, co...</a>       | 84.2      | 84.2        | 100%        | 3e-13   | 100.00%    | 331      | <a href="#">MG256238.1</a> |
| ✓ | <a href="#">Ephedra aphylla voucher SCUI-E13 5.8S ribosomal RNA gene, partial sequence; internal transcribed spacer 2, complete sequence...</a>        | 84.2      | 84.2        | 100%        | 3e-13   | 100.00%    | 356      | <a href="#">MG569946.1</a> |
| ✓ | <a href="#">Ephedra intermedia isolate XZZMH4 internal transcribed spacer 2, complete sequence</a>                                                     | 84.2      | 84.2        | 100%        | 3e-13   | 100.00%    | 251      | <a href="#">MH258183.1</a> |
| ✓ | <a href="#">Ephedra intermedia isolate XZZMH3 internal transcribed spacer 2, complete sequence</a>                                                     | 84.2      | 84.2        | 100%        | 3e-13   | 100.00%    | 251      | <a href="#">MH258182.1</a> |
| ✓ | <a href="#">Ephedra intermedia isolate XZZMH2 internal transcribed spacer 2, complete sequence</a>                                                     | 84.2      | 84.2        | 100%        | 3e-13   | 100.00%    | 251      | <a href="#">MH258181.1</a> |
| ✓ | <a href="#">Ephedra intermedia isolate XZZMH1 internal transcribed spacer 2, complete sequence</a>                                                     | 84.2      | 84.2        | 100%        | 3e-13   | 100.00%    | 251      | <a href="#">MH258180.1</a> |
| ✓ | <a href="#">Ephedra intermedia isolate XZZMH internal transcribed spacer 2, complete sequence</a>                                                      | 84.2      | 84.2        | 100%        | 3e-13   | 100.00%    | 251      | <a href="#">MH258138.1</a> |
| ✓ | <a href="#">Ephedra alata isolate UQU ALP192 5.8S ribosomal RNA gene, partial sequence; internal transcribed spacer 2, complete sequence;...</a>       | 84.2      | 84.2        | 100%        | 3e-13   | 100.00%    | 522      | <a href="#">MH547540.1</a> |
| ✓ | <a href="#">Ephedra sp. KSR-2018 isolate KSR-0024 5.8S ribosomal RNA gene and internal transcribed spacer 2, partial sequence</a>                      | 84.2      | 84.2        | 100%        | 3e-13   | 100.00%    | 365      | <a href="#">MH732928.1</a> |
| ✓ | <a href="#">Ephedra sinica isolate KPS0082A03 internal transcribed spacer 2, partial sequence</a>                                                      | 84.2      | 84.2        | 100%        | 3e-13   | 100.00%    | 251      | <a href="#">MF096260.1</a> |
| ✓ | <a href="#">Ephedra sinica isolate KPS0082A02 internal transcribed spacer 2, partial sequence</a>                                                      | 84.2      | 84.2        | 100%        | 3e-13   | 100.00%    | 251      | <a href="#">MF096259.1</a> |
| ✓ | <a href="#">Ephedra sinica isolate KPS0082A01 internal transcribed spacer 2, partial sequence</a>                                                      | 84.2      | 84.2        | 100%        | 3e-13   | 100.00%    | 251      | <a href="#">MF096258.1</a> |
| ✓ | <a href="#">Ephedra sinica isolate KMS0082A03 internal transcribed spacer 2, partial sequence</a>                                                      | 84.2      | 84.2        | 100%        | 3e-13   | 100.00%    | 251      | <a href="#">MF096257.1</a> |
| ✓ | <a href="#">Ephedra distachya isolate 227 internal transcribed spacer 1, partial sequence; 5.8S ribosomal RNA gene and internal transcribed s...</a>   | 78.7      | 78.7        | 100%        | 1e-11   | 97.78%     | 1161     | <a href="#">GU968568.1</a> |
| ✓ | <a href="#">Ephedra milleri voucher Miller 7667 (E) internal transcribed spacer 1, partial sequence; 5.8S ribosomal RNA gene and internal trans...</a> | 78.7      | 78.7        | 100%        | 1e-11   | 97.78%     | 1563     | <a href="#">FJ958024.1</a> |
| ✓ | <a href="#">Ephedra transitoria voucher Collenette 9095B (E) internal transcribed spacer 1, partial sequence; 5.8S ribosomal RNA gene and int...</a>   | 78.7      | 78.7        | 100%        | 1e-11   | 97.78%     | 855      | <a href="#">FJ958021.1</a> |
| ✓ | <a href="#">Ephedra strobilacea voucher Aellen et Estafandri 2703 (S) internal transcribed spacer 1, partial sequence; 5.8S ribosomal RNA gen...</a>   | 78.7      | 78.7        | 100%        | 1e-11   | 97.78%     | 1599     | <a href="#">FJ958018.1</a> |
| ✓ | <a href="#">Ephedra sarcocarpa voucher Aellen et Estafandri 2786 (S) internal transcribed spacer 1, partial sequence; 5.8S ribosomal RNA gen...</a>    | 78.7      | 78.7        | 100%        | 1e-11   | 97.78%     | 1601     | <a href="#">FJ958017.1</a> |
| ✓ | <a href="#">Ephedra distachya voucher Pidopliczka s.n. (UPS) internal transcribed spacer 1, partial sequence; 5.8S ribosomal RNA gene and i...</a>     | 78.7      | 78.7        | 100%        | 1e-11   | 97.78%     | 1603     | <a href="#">FJ958013.1</a> |
| ✓ | <a href="#">Ephedra somalensis voucher Thulin 10925A (UPS) internal transcribed spacer 1, partial sequence; 5.8S ribosomal RNA gene and i...</a>       | 78.7      | 78.7        | 93%         | 1e-11   | 100.00%    | 1586     | <a href="#">FJ958004.1</a> |
| ✓ | <a href="#">Ephedra distachya internal transcribed spacer 2, partial sequence</a>                                                                      | 78.7      | 78.7        | 100%        | 1e-11   | 97.78%     | 246      | <a href="#">GU186924.1</a> |
| ✓ | <a href="#">Ephedra pachyclada voucher (S) C-7844 18S ribosomal RNA gene, partial sequence; internal transcribed spacer 1, 5.8S ribosomal...</a>       | 78.7      | 78.7        | 93%         | 1e-11   | 100.00%    | 1658     | <a href="#">AY755779.1</a> |
| ✓ | <a href="#">Ephedra distachya voucher (S) 03-684 18S ribosomal RNA gene, partial sequence; internal transcribed spacer 1, 5.8S ribosomal R...</a>      | 78.7      | 78.7        | 100%        | 1e-11   | 97.78%     | 1675     | <a href="#">AY755769.1</a> |
| ✓ | <a href="#">Ephedra trifurca voucher (Mo) 04630447 18S ribosomal RNA gene, partial sequence; internal transcribed spacer 1, 5.8S ribosomal...</a>      | 78.7      | 78.7        | 100%        | 1e-11   | 97.83%     | 1658     | <a href="#">AY755762.1</a> |
| ✓ | <a href="#">Ephedra distachya voucher (S) 04-481 18S ribosomal RNA gene, partial sequence; internal transcribed spacer 1, 5.8S ribosomal R...</a>      | 78.7      | 78.7        | 100%        | 1e-11   | 97.78%     | 1675     | <a href="#">AY755761.1</a> |
| ✓ | <a href="#">Ephedra californica voucher (O) 68-154 18S ribosomal RNA gene, partial sequence; internal transcribed spacer 1, 5.8S ribosomal...</a>      | 78.7      | 78.7        | 100%        | 1e-11   | 97.83%     | 1659     | <a href="#">AY755750.1</a> |
| ✓ | <a href="#">Ephedra foeminea internal transcribed spacer 1, partial sequence; 5.8S ribosomal RNA gene and internal transcribed spacer 2, co...</a>     | 76.8      | 76.8        | 100%        | 5e-11   | 97.78%     | 1563     | <a href="#">KP788808.1</a> |
| ✓ | <a href="#">Ephedra gerardiana voucher (E) E00130259 18S ribosomal RNA gene, partial sequence; internal transcribed spacer 1, 5.8S ribosp...</a>       | 76.8      | 76.8        | 100%        | 5e-11   | 95.56%     | 1658     | <a href="#">AY755753.1</a> |

# Figure S3

|   | Description                                                                                                                                            | Max Score | Total Score | Query Cover | E value | Per Ident | Acc Len | Accession                  |
|---|--------------------------------------------------------------------------------------------------------------------------------------------------------|-----------|-------------|-------------|---------|-----------|---------|----------------------------|
| ✓ | <a href="#">Enhedra likiangensis voucher LJ01 internal transcribed spacer 2 , partial sequence</a>                                                     | 65.8      | 65.8        | 100%        | 4e-08   | 100.00%   | 246     | <a href="#">MF972970.1</a> |
| ✓ | <a href="#">Enhedra sinica voucher CM04 internal transcribed spacer 2 , partial sequence</a>                                                           | 65.8      | 65.8        | 100%        | 4e-08   | 100.00%   | 261     | <a href="#">MF972969.1</a> |
| ✓ | <a href="#">Enhedra sinica voucher CM03 internal transcribed spacer 2 , partial sequence</a>                                                           | 65.8      | 65.8        | 100%        | 4e-08   | 100.00%   | 261     | <a href="#">MF972968.1</a> |
| ✓ | <a href="#">Enhedra sinica voucher CM01 internal transcribed spacer 2 , partial sequence</a>                                                           | 65.8      | 65.8        | 100%        | 4e-08   | 100.00%   | 261     | <a href="#">MF972967.1</a> |
| ✓ | <a href="#">Enhedra sinica voucher CM05 internal transcribed spacer 2 , partial sequence</a>                                                           | 65.8      | 65.8        | 100%        | 4e-08   | 100.00%   | 261     | <a href="#">MF972966.1</a> |
| ✓ | <a href="#">Enhedra sinica voucher CM02 internal transcribed spacer 2 , partial sequence</a>                                                           | 65.8      | 65.8        | 100%        | 4e-08   | 100.00%   | 261     | <a href="#">MF972965.1</a> |
| ✓ | <a href="#">Enhedra major subsp. procera voucher 823-12-2014 5.8S ribosomal RNA gene , partial sequence ; internal transcribed spacer 2 , co...</a>    | 65.8      | 65.8        | 100%        | 4e-08   | 100.00%   | 331     | <a href="#">MG256238.1</a> |
| ✓ | <a href="#">Enhedra aphylla voucher SCUI-E13 5.8S ribosomal RNA gene , partial sequence ; internal transcribed spacer 2 , complete sequence...</a>     | 65.8      | 65.8        | 100%        | 4e-08   | 100.00%   | 356     | <a href="#">MG569946.1</a> |
| ✓ | <a href="#">Enhedra intermedia isolate XZZMH4 internal transcribed spacer 2 , complete sequence</a>                                                    | 65.8      | 65.8        | 100%        | 4e-08   | 100.00%   | 251     | <a href="#">MH258183.1</a> |
| ✓ | <a href="#">Enhedra intermedia isolate XZZMH3 internal transcribed spacer 2 , complete sequence</a>                                                    | 65.8      | 65.8        | 100%        | 4e-08   | 100.00%   | 251     | <a href="#">MH258182.1</a> |
| ✓ | <a href="#">Enhedra intermedia isolate XZZMH2 internal transcribed spacer 2 , complete sequence</a>                                                    | 65.8      | 65.8        | 100%        | 4e-08   | 100.00%   | 251     | <a href="#">MH258181.1</a> |
| ✓ | <a href="#">Enhedra intermedia isolate XZZMH1 internal transcribed spacer 2 , complete sequence</a>                                                    | 65.8      | 65.8        | 100%        | 4e-08   | 100.00%   | 251     | <a href="#">MH258180.1</a> |
| ✓ | <a href="#">Enhedra intermedia isolate XZZMH internal transcribed spacer 2 , complete sequence</a>                                                     | 65.8      | 65.8        | 100%        | 4e-08   | 100.00%   | 251     | <a href="#">MH258138.1</a> |
| ✓ | <a href="#">Enhedra alata isolate UQU ALP192 5.8S ribosomal RNA gene , partial sequence ; internal transcribed spacer 2 , complete sequence;...</a>    | 65.8      | 65.8        | 100%        | 4e-08   | 100.00%   | 522     | <a href="#">MH547540.1</a> |
| ✓ | <a href="#">Enhedra sp. KSR-2018 isolate KSR-0024 5.8S ribosomal RNA gene and internal transcribed spacer 2 , partial sequence</a>                     | 65.8      | 65.8        | 100%        | 4e-08   | 100.00%   | 365     | <a href="#">MH732928.1</a> |
| ✓ | <a href="#">Enhedra sinica isolate KPS0082A03 internal transcribed spacer 2 , partial sequence</a>                                                     | 65.8      | 65.8        | 100%        | 4e-08   | 100.00%   | 251     | <a href="#">MF096260.1</a> |
| ✓ | <a href="#">Enhedra sinica isolate KPS0082A02 internal transcribed spacer 2 , partial sequence</a>                                                     | 65.8      | 65.8        | 100%        | 4e-08   | 100.00%   | 251     | <a href="#">MF096259.1</a> |
| ✓ | <a href="#">Enhedra sinica isolate KPS0082A01 internal transcribed spacer 2 , partial sequence</a>                                                     | 65.8      | 65.8        | 100%        | 4e-08   | 100.00%   | 251     | <a href="#">MF096258.1</a> |
| ✓ | <a href="#">Enhedra sinica isolate KMS0082A03 internal transcribed spacer 2 , partial sequence</a>                                                     | 65.8      | 65.8        | 100%        | 4e-08   | 100.00%   | 251     | <a href="#">MF096257.1</a> |
| ✓ | <a href="#">Enhedra sinica isolate KMS0082A02 internal transcribed spacer 2 , partial sequence</a>                                                     | 65.8      | 65.8        | 100%        | 4e-08   | 100.00%   | 251     | <a href="#">MF096256.1</a> |
| ✓ | <a href="#">Enhedra gerardiana voucher (K) 10141 18S ribosomal RNA gene , partial sequence ; internal transcribed spacer 1 , 5.8S ribosomal R...</a>   | 65.8      | 65.8        | 100%        | 4e-08   | 100.00%   | 1658    | <a href="#">AY755743.1</a> |
| ✓ | <a href="#">Enhedra frustillata voucher (S) 04-482 18S ribosomal RNA gene , partial sequence ; internal transcribed spacer 1 , 5.8S ribosomal R...</a> | 65.8      | 65.8        | 100%        | 4e-08   | 100.00%   | 1659    | <a href="#">AY755743.1</a> |
| ✓ | <a href="#">Enhedra intermedia voucher (S) 03-925 18S ribosomal RNA gene , partial sequence ; internal transcribed spacer 1 , 5.8S ribosomal...</a>    | 65.8      | 65.8        | 100%        | 4e-08   | 100.00%   | 1677    | <a href="#">AY755741.1</a> |
| ✓ | <a href="#">Enhedra equisetina voucher (S) 03-928 18S ribosomal RNA gene , partial sequence ; internal transcribed spacer 1 , 5.8S ribosomal...</a>    | 65.8      | 65.8        | 100%        | 4e-08   | 100.00%   | 1659    | <a href="#">AY755740.1</a> |
| ✓ | <a href="#">Enhedra likiangensis voucher (S) 03-926 18S ribosomal RNA gene , partial sequence ; internal transcribed spacer 1 , 5.8S ribosomal...</a>  | 65.8      | 65.8        | 100%        | 4e-08   | 100.00%   | 1662    | <a href="#">AY755739.1</a> |
| ✓ | <a href="#">Enhedra rhytidosperma 18S ribosomal RNA gene , partial sequence ; internal transcribed spacer 1 , 5.8S ribosomal RNA gene and i...</a>     | 65.8      | 65.8        | 100%        | 4e-08   | 100.00%   | 1590    | <a href="#">DQ028782.2</a> |
| ✓ | <a href="#">Enhedra przewalskii voucher Kamp03071110 internal transcribed spacer 2 , partial sequence</a>                                              | 65.8      | 65.8        | 100%        | 4e-08   | 100.00%   | 246     | <a href="#">AY730605.1</a> |
| ✓ | <a href="#">Enhedra pachyclada voucher SCUI-E11 5.8S ribosomal RNA gene , partial sequence ; internal transcribed spacer 2 , complete seque...</a>     | 63.9      | 63.9        | 97%         | 1e-07   | 100.00%   | 357     | <a href="#">MG569945.1</a> |
| ✓ | <a href="#">Enhedra somalensis voucher Thulin 10925A (UPS) internal transcribed spacer 1 , partial sequence ; 5.8S ribosomal RNA gene and i...</a>     | 63.9      | 63.9        | 97%         | 1e-07   | 100.00%   | 1586    | <a href="#">FJ958004.1</a> |
| ✓ | <a href="#">Enhedra pachyclada voucher (S) C-7844 18S ribosomal RNA gene , partial sequence ; internal transcribed spacer 1 , 5.8S ribosomal...</a>    | 63.9      | 63.9        | 97%         | 1e-07   | 100.00%   | 1658    | <a href="#">AY755779.1</a> |
| ✓ | <a href="#">Enhedra minuta voucher (S) 03-930 18S ribosomal RNA gene , partial sequence ; internal transcribed spacer 1 , 5.8S ribosomal RNA...</a>    | 62.1      | 62.1        | 94%         | 5e-07   | 100.00%   | 1662    | <a href="#">AY755742.1</a> |
| ✓ | <a href="#">Enhedra gerardiana voucher (E) E00130259 18S ribosomal RNA gene , partial sequence ; internal transcribed spacer 1 , 5.8S riboso...</a>    | 60.2      | 60.2        | 91%         | 2e-06   | 100.00%   | 1658    | <a href="#">AY755753.1</a> |

**Figure S4**

|   | Description                                                                                                                                  | Max Score | Total Score | Query Cover | E value | Per. Ident | Acc. Len | Accession                  |
|---|----------------------------------------------------------------------------------------------------------------------------------------------|-----------|-------------|-------------|---------|------------|----------|----------------------------|
| ✓ | <a href="#">Enhedra likiangensis voucher LJ01 internal transcribed spacer 2, partial sequence</a>                                            | 60.0      | 60.0        | 100%        | 3e-06   | 100.00%    | 246      | <a href="#">MF972970.1</a> |
| ✓ | <a href="#">Enhedra sinica voucher CM04 internal transcribed spacer 2, partial sequence</a>                                                  | 60.0      | 60.0        | 100%        | 3e-06   | 100.00%    | 261      | <a href="#">MF972969.1</a> |
| ✓ | <a href="#">Enhedra sinica voucher CM03 internal transcribed spacer 2, partial sequence</a>                                                  | 60.0      | 60.0        | 100%        | 3e-06   | 100.00%    | 261      | <a href="#">MF972968.1</a> |
| ✓ | <a href="#">Enhedra sinica voucher CM01 internal transcribed spacer 2, partial sequence</a>                                                  | 60.0      | 60.0        | 100%        | 3e-06   | 100.00%    | 261      | <a href="#">MF972967.1</a> |
| ✓ | <a href="#">Enhedra sinica voucher CM05 internal transcribed spacer 2, partial sequence</a>                                                  | 60.0      | 60.0        | 100%        | 3e-06   | 100.00%    | 261      | <a href="#">MF972966.1</a> |
| ✓ | <a href="#">Enhedra sinica voucher CM02 internal transcribed spacer 2, partial sequence</a>                                                  | 60.0      | 60.0        | 100%        | 3e-06   | 100.00%    | 261      | <a href="#">MF972965.1</a> |
| ✓ | <a href="#">Enhedra major subsp. procera voucher 823-12-2014 5.8S ribosomal RNA gene, partial sequence; internal transcribed sp...</a>       | 60.0      | 60.0        | 100%        | 3e-06   | 100.00%    | 331      | <a href="#">MG256238.1</a> |
| ✓ | <a href="#">Enhedra aphylla voucher SCUJ-E13 5.8S ribosomal RNA gene, partial sequence; internal transcribed spacer 2, complete...</a>       | 60.0      | 60.0        | 100%        | 3e-06   | 100.00%    | 356      | <a href="#">MG569946.1</a> |
| ✓ | <a href="#">Enhedra intermedia isolate XZZMH4 internal transcribed spacer 2, complete sequence</a>                                           | 60.0      | 60.0        | 100%        | 3e-06   | 100.00%    | 251      | <a href="#">MH258183.1</a> |
| ✓ | <a href="#">Enhedra intermedia isolate XZZMH3 internal transcribed spacer 2, complete sequence</a>                                           | 60.0      | 60.0        | 100%        | 3e-06   | 100.00%    | 251      | <a href="#">MH258182.1</a> |
| ✓ | <a href="#">Enhedra intermedia isolate XZZMH2 internal transcribed spacer 2, complete sequence</a>                                           | 60.0      | 60.0        | 100%        | 3e-06   | 100.00%    | 251      | <a href="#">MH258181.1</a> |
| ✓ | <a href="#">Enhedra intermedia isolate XZZMH1 internal transcribed spacer 2, complete sequence</a>                                           | 60.0      | 60.0        | 100%        | 3e-06   | 100.00%    | 251      | <a href="#">MH258180.1</a> |
| ✓ | <a href="#">Enhedra intermedia isolate XZZMH internal transcribed spacer 2, complete sequence</a>                                            | 60.0      | 60.0        | 100%        | 3e-06   | 100.00%    | 251      | <a href="#">MH258138.1</a> |
| ✓ | <a href="#">Enhedra alata isolate UQU ALP192 5.8S ribosomal RNA gene, partial sequence; internal transcribed spacer 2, complete...</a>       | 60.0      | 60.0        | 100%        | 3e-06   | 100.00%    | 522      | <a href="#">MH547540.1</a> |
| ✓ | <a href="#">Enhedra sp. KSR-2018 isolate KSR-0024 5.8S ribosomal RNA gene and internal transcribed spacer 2, partial sequence</a>            | 60.0      | 60.0        | 100%        | 3e-06   | 100.00%    | 365      | <a href="#">MH732928.1</a> |
| ✓ | <a href="#">Enhedra sinica isolate KPS0082A03 internal transcribed spacer 2, partial sequence</a>                                            | 60.0      | 60.0        | 100%        | 3e-06   | 100.00%    | 251      | <a href="#">MF096260.1</a> |
| ✓ | <a href="#">Enhedra sinica isolate KPS0082A02 internal transcribed spacer 2, partial sequence</a>                                            | 60.0      | 60.0        | 100%        | 3e-06   | 100.00%    | 251      | <a href="#">MF096259.1</a> |
| ✓ | <a href="#">Enhedra sinica isolate KPS0082A01 internal transcribed spacer 2, partial sequence</a>                                            | 60.0      | 60.0        | 100%        | 3e-06   | 100.00%    | 251      | <a href="#">MF096258.1</a> |
| ✓ | <a href="#">Enhedra sinica isolate KMS0082A03 internal transcribed spacer 2, partial sequence</a>                                            | 60.0      | 60.0        | 100%        | 3e-06   | 100.00%    | 251      | <a href="#">MF096257.1</a> |
| ✓ | <a href="#">Enhedra przewalskii voucher Kamp03071110 internal transcribed spacer 2, partial sequence</a>                                     | 60.0      | 60.0        | 100%        | 3e-06   | 100.00%    | 246      | <a href="#">AY730605.1</a> |
| ✓ | <a href="#">Enhedra pachyclada voucher SCUJ-E11 5.8S ribosomal RNA gene, partial sequence; internal transcribed spacer 2, compl...</a>       | 58.0      | 58.0        | 96%         | 1e-05   | 100.00%    | 357      | <a href="#">MG569945.1</a> |
| ✓ | <a href="#">Enhedra somalensis voucher Thulin 10925A (UPS) internal transcribed spacer 1, partial sequence; 5.8S ribosomal RNA g...</a>      | 58.0      | 58.0        | 96%         | 1e-05   | 100.00%    | 1586     | <a href="#">FJ958004.1</a> |
| ✓ | <a href="#">Enhedra pachyclada voucher (S) C-7844 18S ribosomal RNA gene, partial sequence; internal transcribed spacer 1, 5.8S...</a>       | 58.0      | 58.0        | 96%         | 1e-05   | 100.00%    | 1658     | <a href="#">AY755779.1</a> |
| ✓ | <a href="#">Enhedra triandra voucher Ickert-Bond 1227 (ASU) 18S ribosomal RNA gene, partial sequence; internal transcribed space...</a>      | 54.0      | 54.0        | 90%         | 2e-04   | 100.00%    | 1649     | <a href="#">KP788840.1</a> |
| ✓ | <a href="#">Enhedra foeminea internal transcribed spacer 1, partial sequence; 5.8S ribosomal RNA gene and internal transcribed spa...</a>    | 54.0      | 54.0        | 90%         | 2e-04   | 100.00%    | 1563     | <a href="#">KP788808.1</a> |
| ✓ | <a href="#">Enhedra foeminea voucher Osvald 26068 (UPS) internal transcribed spacer 1, partial sequence; 5.8S ribosomal RNA gen...</a>       | 54.0      | 54.0        | 100%        | 2e-04   | 96.67%     | 1564     | <a href="#">FJ958007.1</a> |
| ✓ | <a href="#">Enhedra andina voucher (K) 10140 18S ribosomal RNA gene, partial sequence; internal transcribed spacer 1, 5.8S riboso...</a>     | 54.0      | 54.0        | 100%        | 2e-04   | 96.67%     | 1659     | <a href="#">AY755744.1</a> |
| ✓ | <a href="#">Enhedra major subsp. procera voucher H. Freitag 26.636 internal transcribed spacer 2, complete sequence</a>                      | 52.0      | 52.0        | 86%         | 9e-04   | 100.00%    | 246      | <a href="#">JQ726590.1</a> |
| ✓ | <a href="#">Enhedra distachya isolate 227 internal transcribed spacer 1, partial sequence; 5.8S ribosomal RNA gene and internal tran...</a>  | 52.0      | 52.0        | 86%         | 9e-04   | 100.00%    | 1161     | <a href="#">GU968568.1</a> |
| ✓ | <a href="#">Enhedra milleri voucher Miller 7667 (E) internal transcribed spacer 1, partial sequence; 5.8S ribosomal RNA gene and int...</a>  | 52.0      | 52.0        | 100%        | 9e-04   | 96.67%     | 1563     | <a href="#">FJ958024.1</a> |
| ✓ | <a href="#">Enhedra transitoria voucher Collenette 9095B (E) internal transcribed spacer 1, partial sequence; 5.8S ribosomal RNA ge...</a>   | 52.0      | 52.0        | 86%         | 9e-04   | 100.00%    | 855      | <a href="#">FJ958021.1</a> |
| ✓ | <a href="#">Enhedra strobilacea voucher Aellen et Estafandri 2703 (S) internal transcribed spacer 1, partial sequence; 5.8S ribosomal...</a> | 52.0      | 52.0        | 86%         | 9e-04   | 100.00%    | 1599     | <a href="#">FJ958018.1</a> |
| ✓ | <a href="#">Enhedra sarcocarpa voucher Aellen et Estafandri 2786 (S) internal transcribed spacer 1, partial sequence; 5.8S ribosoma...</a>   | 52.0      | 52.0        | 86%         | 9e-04   | 100.00%    | 1601     | <a href="#">FJ958017.1</a> |
| ✓ | <a href="#">Enhedra distachya voucher Pidopliczka s.n. (UPS) internal transcribed spacer 1, partial sequence; 5.8S ribosomal RNA g...</a>    | 52.0      | 52.0        | 86%         | 9e-04   | 100.00%    | 1603     | <a href="#">FJ958013.1</a> |
| ✓ | <a href="#">Enhedra distachya internal transcribed spacer 2, partial sequence</a>                                                            | 52.0      | 52.0        | 86%         | 9e-04   | 100.00%    | 246      | <a href="#">GU186924.1</a> |
| ✓ | <a href="#">Enhedra distachya voucher (S) 03-684 18S ribosomal RNA gene, partial sequence; internal transcribed spacer 1, 5.8S rib...</a>    | 52.0      | 52.0        | 86%         | 9e-04   | 100.00%    | 1675     | <a href="#">AY755769.1</a> |

**Figure S5**

|   | Description                                                                                                                                   | Max Score | Total Score | Query Cover | E value | Per. Ident | Acc. Len | Accession                  |
|---|-----------------------------------------------------------------------------------------------------------------------------------------------|-----------|-------------|-------------|---------|------------|----------|----------------------------|
| ✓ | <a href="#">Enhedra likiangensis voucher LJ01 internal transcribed spacer 2 , partial sequence</a>                                            | 54.0      | 54.0        | 100%        | 1e-04   | 100.00%    | 246      | <a href="#">MF972970.1</a> |
| ✓ | <a href="#">Enhedra sinica voucher CM04 internal transcribed spacer 2 , partial sequence</a>                                                  | 54.0      | 54.0        | 100%        | 1e-04   | 100.00%    | 261      | <a href="#">MF972969.1</a> |
| ✓ | <a href="#">Enhedra sinica voucher CM03 internal transcribed spacer 2 , partial sequence</a>                                                  | 54.0      | 54.0        | 100%        | 1e-04   | 100.00%    | 261      | <a href="#">MF972968.1</a> |
| ✓ | <a href="#">Enhedra sinica voucher CM01 internal transcribed spacer 2 , partial sequence</a>                                                  | 54.0      | 54.0        | 100%        | 1e-04   | 100.00%    | 261      | <a href="#">MF972967.1</a> |
| ✓ | <a href="#">Enhedra sinica voucher CM05 internal transcribed spacer 2 , partial sequence</a>                                                  | 54.0      | 54.0        | 100%        | 1e-04   | 100.00%    | 261      | <a href="#">MF972966.1</a> |
| ✓ | <a href="#">Enhedra sinica voucher CM02 internal transcribed spacer 2 , partial sequence</a>                                                  | 54.0      | 54.0        | 100%        | 1e-04   | 100.00%    | 261      | <a href="#">MF972965.1</a> |
| ✓ | <a href="#">Enhedra major subsp. procera voucher 823-12-2014 5.8S ribosomal RNA gene , partial sequence; internal transcribed sp...</a>       | 54.0      | 54.0        | 100%        | 1e-04   | 100.00%    | 331      | <a href="#">MG256238.1</a> |
| ✓ | <a href="#">Enhedra aphylla voucher SCUI-E13 5.8S ribosomal RNA gene , partial sequence; internal transcribed spacer 2 , complete...</a>      | 54.0      | 54.0        | 100%        | 1e-04   | 100.00%    | 356      | <a href="#">MG568946.1</a> |
| ✓ | <a href="#">Enhedra pachyclada voucher SCUI-E11 5.8S ribosomal RNA gene , partial sequence; internal transcribed spacer 2 , compl...</a>      | 54.0      | 54.0        | 100%        | 1e-04   | 100.00%    | 357      | <a href="#">MG568945.1</a> |
| ✓ | <a href="#">Enhedra intermedia isolate XZZMH4 internal transcribed spacer 2 , complete sequence</a>                                           | 54.0      | 54.0        | 100%        | 1e-04   | 100.00%    | 251      | <a href="#">MH258183.1</a> |
| ✓ | <a href="#">Enhedra intermedia isolate XZZMH3 internal transcribed spacer 2 , complete sequence</a>                                           | 54.0      | 54.0        | 100%        | 1e-04   | 100.00%    | 251      | <a href="#">MH258182.1</a> |
| ✓ | <a href="#">Enhedra intermedia isolate XZZMH2 internal transcribed spacer 2 , complete sequence</a>                                           | 54.0      | 54.0        | 100%        | 1e-04   | 100.00%    | 251      | <a href="#">MH258181.1</a> |
| ✓ | <a href="#">Enhedra intermedia isolate XZZMH1 internal transcribed spacer 2 , complete sequence</a>                                           | 54.0      | 54.0        | 100%        | 1e-04   | 100.00%    | 251      | <a href="#">MH258180.1</a> |
| ✓ | <a href="#">Enhedra intermedia isolate XZZMH internal transcribed spacer 2 , complete sequence</a>                                            | 54.0      | 54.0        | 100%        | 1e-04   | 100.00%    | 251      | <a href="#">MH258138.1</a> |
| ✓ | <a href="#">Enhedra alata isolate UQU ALP192 5.8S ribosomal RNA gene , partial sequence; internal transcribed spacer 2 , complete...</a>      | 54.0      | 54.0        | 100%        | 1e-04   | 100.00%    | 522      | <a href="#">MH547540.1</a> |
| ✓ | <a href="#">Enhedra sp. KSR-2018 isolate KSR-0024 5.8S ribosomal RNA gene and internal transcribed spacer 2 , partial sequence</a>            | 54.0      | 54.0        | 100%        | 1e-04   | 100.00%    | 365      | <a href="#">MH732928.1</a> |
| ✓ | <a href="#">Enhedra sinica isolate KPS0082A03 internal transcribed spacer 2 , partial sequence</a>                                            | 54.0      | 54.0        | 100%        | 1e-04   | 100.00%    | 251      | <a href="#">MF096260.1</a> |
| ✓ | <a href="#">Enhedra sinica isolate KPS0082A02 internal transcribed spacer 2 , partial sequence</a>                                            | 54.0      | 54.0        | 100%        | 1e-04   | 100.00%    | 251      | <a href="#">MF096259.1</a> |
| ✓ | <a href="#">Enhedra sinica isolate KPS0082A01 internal transcribed spacer 2 , partial sequence</a>                                            | 54.0      | 54.0        | 100%        | 1e-04   | 100.00%    | 251      | <a href="#">MF096258.1</a> |
| ✓ | <a href="#">Enhedra sinica isolate KMS0082A03 internal transcribed spacer 2 , partial sequence</a>                                            | 54.0      | 54.0        | 100%        | 1e-04   | 100.00%    | 251      | <a href="#">MF096257.1</a> |
| ✓ | <a href="#">Enhedra frustillata voucher (S) 04-482 18S ribosomal RNA gene , partial sequence; internal transcribed spacer 1 , 5.8S rib...</a> | 54.0      | 54.0        | 100%        | 1e-04   | 100.00%    | 1659     | <a href="#">AY755743.1</a> |
| ✓ | <a href="#">Enhedra minuta voucher (S) 03-930 18S ribosomal RNA gene , partial sequence; internal transcribed spacer 1 , 5.8S ribos...</a>    | 54.0      | 54.0        | 100%        | 1e-04   | 100.00%    | 1662     | <a href="#">AY755742.1</a> |
| ✓ | <a href="#">Enhedra intermedia voucher (S) 03-925 18S ribosomal RNA gene , partial sequence; internal transcribed spacer 1 , 5.8S r...</a>    | 54.0      | 54.0        | 100%        | 1e-04   | 100.00%    | 1677     | <a href="#">AY755741.1</a> |
| ✓ | <a href="#">Enhedra equisetina voucher (S) 03-928 18S ribosomal RNA gene , partial sequence; internal transcribed spacer 1 , 5.8S r...</a>    | 54.0      | 54.0        | 100%        | 1e-04   | 100.00%    | 1659     | <a href="#">AY755740.1</a> |
| ✓ | <a href="#">Enhedra likiangensis voucher (S) 03-926 18S ribosomal RNA gene , partial sequence; internal transcribed spacer 1 , 5.8S...</a>    | 54.0      | 54.0        | 100%        | 1e-04   | 100.00%    | 1662     | <a href="#">AY755739.1</a> |
| ✓ | <a href="#">Enhedra rhytidosperma 18S ribosomal RNA gene , partial sequence; internal transcribed spacer 1 , 5.8S ribosomal RNA g...</a>      | 54.0      | 54.0        | 100%        | 1e-04   | 100.00%    | 1590     | <a href="#">DQ028782.2</a> |
| ✓ | <a href="#">Enhedra przewalskii voucher Kamp03071110 internal transcribed spacer 2 , partial sequence</a>                                     | 54.0      | 54.0        | 100%        | 1e-04   | 100.00%    | 246      | <a href="#">AY730605.1</a> |
| ✓ | <a href="#">Enhedra triandra voucher Ickert-Bond 1227 (ASU) 18S ribosomal RNA gene , partial sequence; internal transcribed space...</a>      | 52.0      | 52.0        | 96%         | 6e-04   | 100.00%    | 1649     | <a href="#">KP788840.1</a> |
| ✓ | <a href="#">Enhedra foeminea internal transcribed spacer 1 , partial sequence; 5.8S ribosomal RNA gene and internal transcribed spa...</a>    | 52.0      | 52.0        | 96%         | 6e-04   | 100.00%    | 1563     | <a href="#">KP788808.1</a> |
| ✓ | <a href="#">Enhedra major subsp. procera voucher H. Freitag 26.636 internal transcribed spacer 2 , complete sequence</a>                      | 50.1      | 50.1        | 92%         | 0.002   | 100.00%    | 246      | <a href="#">JG726590.1</a> |
| ✓ | <a href="#">Enhedra distachya isolate 227 internal transcribed spacer 1 , partial sequence; 5.8S ribosomal RNA gene and internal tran...</a>  | 50.1      | 50.1        | 92%         | 0.002   | 100.00%    | 1161     | <a href="#">GU968568.1</a> |
| ✓ | <a href="#">Enhedra transitoria voucher Collenette 9095B (E) internal transcribed spacer 1 , partial sequence; 5.8S ribosomal RNA ge...</a>   | 50.1      | 50.1        | 92%         | 0.002   | 100.00%    | 855      | <a href="#">FJ958021.1</a> |
| ✓ | <a href="#">Enhedra strobilacea voucher Aellen et Estafandri 2703 (S) internal transcribed spacer 1 , partial sequence; 5.8S ribosomal...</a> | 50.1      | 50.1        | 92%         | 0.002   | 100.00%    | 1599     | <a href="#">FJ958018.1</a> |
| ✓ | <a href="#">Enhedra sarcocarpa voucher Aellen et Estafandri 2786 (S) internal transcribed spacer 1 , partial sequence; 5.8S ribosoma...</a>   | 50.1      | 50.1        | 92%         | 0.002   | 100.00%    | 1601     | <a href="#">FJ958017.1</a> |
| ✓ | <a href="#">Enhedra distachya voucher Pidopliczka s.n. (UPS) internal transcribed spacer 1 , partial sequence; 5.8S ribosomal RNA g...</a>    | 50.1      | 50.1        | 92%         | 0.002   | 100.00%    | 1603     | <a href="#">FJ958013.1</a> |
| ✓ | <a href="#">Enhedra foeminea voucher Osvald 26068 (UPS) internal transcribed spacer 1 , partial sequence; 5.8S ribosomal RNA gen...</a>       | 50.1      | 50.1        | 92%         | 0.002   | 100.00%    | 1564     | <a href="#">FJ958007.1</a> |
| ✓ | <a href="#">Enhedra distachya internal transcribed spacer 2 , partial sequence</a>                                                            | 50.1      | 50.1        | 92%         | 0.002   | 100.00%    | 246      | <a href="#">GU186924.1</a> |
| ✓ | <a href="#">Enhedra distachya voucher (S) 03-684 18S ribosomal RNA gene , partial sequence; internal transcribed spacer 1 , 5.8S rib...</a>   | 50.1      | 50.1        | 92%         | 0.002   | 100.00%    | 1675     | <a href="#">AY755769.1</a> |
| ✓ | <a href="#">Enhedra distachya voucher (S) 04-481 18S ribosomal RNA gene , partial sequence; internal transcribed spacer 1 , 5.8S rib...</a>   | 50.1      | 50.1        | 92%         | 0.002   | 100.00%    | 1675     | <a href="#">AY755761.1</a> |
| ✓ | <a href="#">Enhedra andina voucher (K) 10140 18S ribosomal RNA gene , partial sequence; internal transcribed spacer 1 , 5.8S riboso...</a>    | 48.1      | 48.1        | 100%        | 0.009   | 96.30%     | 1659     | <a href="#">AY755744.1</a> |
| ✓ | <a href="#">Enhedra milleri voucher Miller 7667 (E) internal transcribed spacer 1 , partial sequence; 5.8S ribosomal RNA gene and int...</a>  | 46.1      | 46.1        | 100%        | 0.035   | 96.30%     | 1563     | <a href="#">FJ958024.1</a> |
| ✓ | <a href="#">Streptomyces sp. TLL_053 genome assembly , chromosome.1</a>                                                                       | 44.1      | 374         | 85%         | 0.14    | 100.00%    | 9900053  | <a href="#">LT629775.1</a> |
| ✓ | <a href="#">Colchicum chlorobasis voucher C4225 internal transcribed spacer 1 and 5.8S ribosomal RNA gene , partial sequence</a>              | 44.1      | 44.1        | 81%         | 0.14    | 100.00%    | 202      | <a href="#">MF596365.1</a> |



**Figure S6**

|   | Description                                                                                                                            | Max Score | Total Score | Query Cover | E value | Per. Ident | Acc. Len | Accession                  |
|---|----------------------------------------------------------------------------------------------------------------------------------------|-----------|-------------|-------------|---------|------------|----------|----------------------------|
| ✓ | <a href="#">Nocardioides cynanchi strain SB3-45 chromosome, complete genome</a>                                                        | 40.1      | 163         | 100%        | 0.72    | 100.00%    | 3998545  | <a href="#">CP044344.1</a> |
| ✓ | <a href="#">Pseudomonas thivervalensis strain PLM3 genome</a>                                                                          | 40.1      | 40.1        | 100%        | 0.72    | 100.00%    | 6591188  | <a href="#">CP022202.1</a> |
| ✓ | <a href="#">Pseudomonas thivervalensis strain SC5 genome</a>                                                                           | 40.1      | 40.1        | 100%        | 0.72    | 100.00%    | 6592350  | <a href="#">CP022201.1</a> |
| ✓ | <a href="#">Streptomyces sp. TL1_053 genome assembly, chromosome, I</a>                                                                | 40.1      | 636         | 100%        | 0.72    | 100.00%    | 9900053  | <a href="#">LT629775.1</a> |
| ✓ | <a href="#">Pseudomonas thivervalensis strain BS3779 genome assembly, chromosome, I</a>                                                | 40.1      | 40.1        | 100%        | 0.72    | 100.00%    | 6604078  | <a href="#">LT629691.1</a> |
| ✓ | <a href="#">Micromonospora coxensis strain DSM 45161 genome assembly, chromosome, I</a>                                                | 40.1      | 686         | 100%        | 0.72    | 100.00%    | 6769793  | <a href="#">LT607753.1</a> |
| ✓ | <a href="#">Halopenitus persicus DNA, complete genome, strain CBA1233</a>                                                              | 40.1      | 197         | 100%        | 0.72    | 100.00%    | 2967917  | <a href="#">AP017558.1</a> |
| ✓ | <a href="#">Mycobacterium riadhense strain NTM chromosome</a>                                                                          | 40.1      | 102         | 100%        | 0.72    | 100.00%    | 6772223  | <a href="#">CP045092.1</a> |
| ✓ | <a href="#">Curtobacterium sp. YC1 chromosome, complete genome</a>                                                                     | 40.1      | 130         | 100%        | 0.72    | 100.00%    | 3301309  | <a href="#">CP066341.1</a> |
| ✓ | <a href="#">Salinispora tropica CNB-440, complete genome</a>                                                                           | 40.1      | 191         | 100%        | 0.72    | 100.00%    | 5183331  | <a href="#">CP000667.1</a> |
| ✓ | <a href="#">XXX</a>                                                                                                                    | 40.1      | 40.1        | 100%        | 0.72    | 100.00%    | 46394    | <a href="#">LR589107.1</a> |
| ✓ | <a href="#">XXX</a>                                                                                                                    | 40.1      | 40.1        | 100%        | 0.72    | 100.00%    | 46394    | <a href="#">LR589013.1</a> |
| ✓ | <a href="#">Colchicum chlorobasis voucher C4225 internal transcribed spacer 1 and 5.8S ribosomal RNA gene, partial sequence</a>        | 40.1      | 40.1        | 100%        | 0.72    | 100.00%    | 202      | <a href="#">MF596365.1</a> |
| ✓ | <a href="#">Ephedra likiangensis voucher LJ01 internal transcribed spacer 2, partial sequence</a>                                      | 40.1      | 40.1        | 100%        | 0.72    | 100.00%    | 246      | <a href="#">MF972970.1</a> |
| ✓ | <a href="#">Ephedra sinica voucher CM04 internal transcribed spacer 2, partial sequence</a>                                            | 40.1      | 40.1        | 100%        | 0.72    | 100.00%    | 261      | <a href="#">MF972969.1</a> |
| ✓ | <a href="#">Ephedra sinica voucher CM03 internal transcribed spacer 2, partial sequence</a>                                            | 40.1      | 40.1        | 100%        | 0.72    | 100.00%    | 261      | <a href="#">MF972968.1</a> |
| ✓ | <a href="#">Ephedra sinica voucher CM01 internal transcribed spacer 2, partial sequence</a>                                            | 40.1      | 40.1        | 100%        | 0.72    | 100.00%    | 261      | <a href="#">MF972967.1</a> |
| ✓ | <a href="#">Ephedra sinica voucher CM05 internal transcribed spacer 2, partial sequence</a>                                            | 40.1      | 40.1        | 100%        | 0.72    | 100.00%    | 261      | <a href="#">MF972966.1</a> |
| ✓ | <a href="#">Ephedra sinica voucher CM02 internal transcribed spacer 2, partial sequence</a>                                            | 40.1      | 40.1        | 100%        | 0.72    | 100.00%    | 261      | <a href="#">MF972965.1</a> |
| ✓ | <a href="#">Uncultured organism clone KBTEX_76 genomic sequence</a>                                                                    | 40.1      | 40.1        | 100%        | 0.72    | 100.00%    | 14869    | <a href="#">MN079151.1</a> |
| ✓ | <a href="#">Ephedra major subsp. procera voucher 823-12-2014 5.8S ribosomal RNA gene, partial sequence; internal transcribed sp...</a> | 40.1      | 40.1        | 100%        | 0.72    | 100.00%    | 331      | <a href="#">MG256238.1</a> |
| ✓ | <a href="#">Ephedra aphylla voucher SCUJ-E13 5.8S ribosomal RNA gene, partial sequence; internal transcribed spacer 2, complete...</a> | 40.1      | 40.1        | 100%        | 0.72    | 100.00%    | 356      | <a href="#">MG569946.1</a> |
| ✓ | <a href="#">Ephedra pachyclada voucher SCUJ-E11 5.8S ribosomal RNA gene, partial sequence; internal transcribed spacer 2, compl...</a> | 40.1      | 40.1        | 100%        | 0.72    | 100.00%    | 357      | <a href="#">MG569945.1</a> |
| ✓ | <a href="#">Ephedra intermedia isolate XZZMH4 internal transcribed spacer 2, complete sequence</a>                                     | 40.1      | 40.1        | 100%        | 0.72    | 100.00%    | 251      | <a href="#">MH258183.1</a> |
| ✓ | <a href="#">Ephedra intermedia isolate XZZMH3 internal transcribed spacer 2, complete sequence</a>                                     | 40.1      | 40.1        | 100%        | 0.72    | 100.00%    | 251      | <a href="#">MH258182.1</a> |
| ✓ | <a href="#">Ephedra intermedia isolate XZZMH2 internal transcribed spacer 2, complete sequence</a>                                     | 40.1      | 40.1        | 100%        | 0.72    | 100.00%    | 251      | <a href="#">MH258181.1</a> |
| ✓ | <a href="#">Ephedra intermedia isolate XZZMH1 internal transcribed spacer 2, complete sequence</a>                                     | 40.1      | 40.1        | 100%        | 0.72    | 100.00%    | 251      | <a href="#">MH258180.1</a> |

Figure S7

|   | Description                                                                                                                                 | Max Score | Total Score | Query Cover | E value | Per. Ident | Acc. Len | Accession                  |
|---|---------------------------------------------------------------------------------------------------------------------------------------------|-----------|-------------|-------------|---------|------------|----------|----------------------------|
| ✓ | <a href="#">Ehnedra likiangensis voucher LJ01 internal transcribed spacer 2, partial sequence</a>                                           | 46.1      | 46.1        | 100%        | 0.018   | 100.00%    | 246      | <a href="#">MF972970.1</a> |
| ✓ | <a href="#">Ehnedra sinica voucher CM04 internal transcribed spacer 2, partial sequence</a>                                                 | 46.1      | 46.1        | 100%        | 0.018   | 100.00%    | 261      | <a href="#">MF972969.1</a> |
| ✓ | <a href="#">Ehnedra sinica voucher CM03 internal transcribed spacer 2, partial sequence</a>                                                 | 46.1      | 46.1        | 100%        | 0.018   | 100.00%    | 261      | <a href="#">MF972968.1</a> |
| ✓ | <a href="#">Ehnedra sinica voucher CM01 internal transcribed spacer 2, partial sequence</a>                                                 | 46.1      | 46.1        | 100%        | 0.018   | 100.00%    | 261      | <a href="#">MF972967.1</a> |
| ✓ | <a href="#">Ehnedra sinica voucher CM05 internal transcribed spacer 2, partial sequence</a>                                                 | 46.1      | 46.1        | 100%        | 0.018   | 100.00%    | 261      | <a href="#">MF972966.1</a> |
| ✓ | <a href="#">Ehnedra sinica voucher CM02 internal transcribed spacer 2, partial sequence</a>                                                 | 46.1      | 46.1        | 100%        | 0.018   | 100.00%    | 261      | <a href="#">MF972965.1</a> |
| ✓ | <a href="#">Ehnedra major subsp. procera voucher 823-12-2014 5.8S ribosomal RNA gene, partial sequence; internal transcribed sp...</a>      | 46.1      | 46.1        | 100%        | 0.018   | 100.00%    | 331      | <a href="#">MG256238.1</a> |
| ✓ | <a href="#">Ehnedra aphylla voucher SCUI-E13 5.8S ribosomal RNA gene, partial sequence; internal transcribed spacer 2, complete...</a>      | 46.1      | 46.1        | 100%        | 0.018   | 100.00%    | 356      | <a href="#">MG569946.1</a> |
| ✓ | <a href="#">Ehnedra pachyclada voucher SCUI-E11 5.8S ribosomal RNA gene, partial sequence; internal transcribed spacer 2, compl...</a>      | 46.1      | 46.1        | 100%        | 0.018   | 100.00%    | 357      | <a href="#">MG569945.1</a> |
| ✓ | <a href="#">Ehnedra intermedia isolate XZZMH4 internal transcribed spacer 2, complete sequence</a>                                          | 46.1      | 46.1        | 100%        | 0.018   | 100.00%    | 251      | <a href="#">MH258183.1</a> |
| ✓ | <a href="#">Ehnedra intermedia isolate XZZMH3 internal transcribed spacer 2, complete sequence</a>                                          | 46.1      | 46.1        | 100%        | 0.018   | 100.00%    | 251      | <a href="#">MH258182.1</a> |
| ✓ | <a href="#">Ehnedra intermedia isolate XZZMH2 internal transcribed spacer 2, complete sequence</a>                                          | 46.1      | 46.1        | 100%        | 0.018   | 100.00%    | 251      | <a href="#">MH258181.1</a> |
| ✓ | <a href="#">Ehnedra intermedia isolate XZZMH1 internal transcribed spacer 2, complete sequence</a>                                          | 46.1      | 46.1        | 100%        | 0.018   | 100.00%    | 251      | <a href="#">MH258180.1</a> |
| ✓ | <a href="#">Ehnedra intermedia isolate XZZMH internal transcribed spacer 2, complete sequence</a>                                           | 46.1      | 46.1        | 100%        | 0.018   | 100.00%    | 251      | <a href="#">MH258138.1</a> |
| ✓ | <a href="#">Ehnedra alata isolate UQU ALP192 5.8S ribosomal RNA gene, partial sequence; internal transcribed spacer 2, complete...</a>      | 46.1      | 46.1        | 100%        | 0.018   | 100.00%    | 522      | <a href="#">MH547540.1</a> |
| ✓ | <a href="#">Ehnedra sp. KSR-2018 isolate KSR-0024 5.8S ribosomal RNA gene and internal transcribed spacer 2, partial sequence</a>           | 46.1      | 46.1        | 100%        | 0.018   | 100.00%    | 365      | <a href="#">MH732928.1</a> |
| ✓ | <a href="#">Ehnedra sinica isolate KPS0082A03 internal transcribed spacer 2, partial sequence</a>                                           | 46.1      | 46.1        | 100%        | 0.018   | 100.00%    | 251      | <a href="#">MF096260.1</a> |
| ✓ | <a href="#">Ehnedra sinica isolate KPS0082A02 internal transcribed spacer 2, partial sequence</a>                                           | 46.1      | 46.1        | 100%        | 0.018   | 100.00%    | 251      | <a href="#">MF096259.1</a> |
| ✓ | <a href="#">Ehnedra sinica isolate KPS0082A01 internal transcribed spacer 2, partial sequence</a>                                           | 46.1      | 46.1        | 100%        | 0.018   | 100.00%    | 251      | <a href="#">MF096258.1</a> |
| ✓ | <a href="#">Ehnedra sinica isolate KMS0082A03 internal transcribed spacer 2, partial sequence</a>                                           | 46.1      | 46.1        | 100%        | 0.018   | 100.00%    | 251      | <a href="#">MF096257.1</a> |
| ✓ | <a href="#">Ehnedra sinica isolate KMS0082A02 internal transcribed spacer 2, partial sequence</a>                                           | 46.1      | 46.1        | 100%        | 0.018   | 100.00%    | 251      | <a href="#">MF096256.1</a> |
| ✓ | <a href="#">Ehnedra intermedia isolate KMS0081A03 internal transcribed spacer 2, partial sequence</a>                                       | 46.1      | 46.1        | 100%        | 0.018   | 100.00%    | 251      | <a href="#">MF096255.1</a> |
| ✓ | <a href="#">Ehnedra intermedia isolate KMS0081A02 internal transcribed spacer 2, partial sequence</a>                                       | 46.1      | 46.1        | 100%        | 0.018   | 100.00%    | 251      | <a href="#">MF096254.1</a> |
| ✓ | <a href="#">Ehnedra intermedia isolate KMS0081A01 internal transcribed spacer 2, partial sequence</a>                                       | 46.1      | 46.1        | 100%        | 0.018   | 100.00%    | 251      | <a href="#">MF096253.1</a> |
| ✓ | <a href="#">Ehnedra sinica isolate KMS0082A01 internal transcribed spacer 2, partial sequence</a>                                           | 46.1      | 46.1        | 100%        | 0.018   | 100.00%    | 251      | <a href="#">MF096252.1</a> |
| ✓ | <a href="#">Ehnedra intermedia isolate KPS0081A02 internal transcribed spacer 2, partial sequence</a>                                       | 46.1      | 46.1        | 100%        | 0.018   | 100.00%    | 251      | <a href="#">MF096251.1</a> |
| ✓ | <a href="#">Ehnedra intermedia isolate KPS0081A03 internal transcribed spacer 2, partial sequence</a>                                       | 46.1      | 46.1        | 100%        | 0.018   | 100.00%    | 251      | <a href="#">MF096250.1</a> |
| ✓ | <a href="#">Ehnedra intermedia isolate KPS0081A01 internal transcribed spacer 2, partial sequence</a>                                       | 46.1      | 46.1        | 100%        | 0.018   | 100.00%    | 251      | <a href="#">MF096249.1</a> |
| ✓ | <a href="#">Ehnedra equisetina isolate KPS0080A03 internal transcribed spacer 2, partial sequence</a>                                       | 46.1      | 46.1        | 100%        | 0.018   | 100.00%    | 251      | <a href="#">MF096248.1</a> |
| ✓ | <a href="#">Ehnedra equisetina isolate KPS0080A01 internal transcribed spacer 2, partial sequence</a>                                       | 46.1      | 46.1        | 100%        | 0.018   | 100.00%    | 251      | <a href="#">MF096247.1</a> |
| ✓ | <a href="#">Ehnedra equisetina isolate KMS0080A02 internal transcribed spacer 2, partial sequence</a>                                       | 46.1      | 46.1        | 100%        | 0.018   | 100.00%    | 251      | <a href="#">MF096246.1</a> |
| ✓ | <a href="#">Ehnedra equisetina isolate KMS0080A01 internal transcribed spacer 2, partial sequence</a>                                       | 46.1      | 46.1        | 100%        | 0.018   | 100.00%    | 251      | <a href="#">MF096245.1</a> |
| ✓ | <a href="#">Ehnedra equisetina isolate KPS0080A02 internal transcribed spacer 2, partial sequence</a>                                       | 46.1      | 46.1        | 100%        | 0.018   | 100.00%    | 251      | <a href="#">MF096244.1</a> |
| ✓ | <a href="#">Ehnedra equisetina isolate KMS0080A03 internal transcribed spacer 2, partial sequence</a>                                       | 46.1      | 46.1        | 100%        | 0.018   | 100.00%    | 251      | <a href="#">MF096243.1</a> |
| ✓ | <a href="#">Ehnedra saxatilis 5.8S ribosomal RNA gene, partial sequence; internal transcribed spacer 2, complete sequence; and 26...</a>    | 46.1      | 46.1        | 100%        | 0.018   | 100.00%    | 370      | <a href="#">MF785606.1</a> |
| ✓ | <a href="#">Ehnedra intermedia voucher YC0347MT07 internal transcribed spacer 2, partial sequence</a>                                       | 46.1      | 46.1        | 100%        | 0.018   | 100.00%    | 251      | <a href="#">KX779088.1</a> |
| ✓ | <a href="#">Ehnedra intermedia voucher YC0347MT21 internal transcribed spacer 2, partial sequence</a>                                       | 46.1      | 46.1        | 100%        | 0.018   | 100.00%    | 251      | <a href="#">KX779087.1</a> |
| ✓ | <a href="#">Ehnedra regelliana voucher YC0715MT03 internal transcribed spacer 2, partial sequence</a>                                       | 46.1      | 46.1        | 100%        | 0.018   | 100.00%    | 251      | <a href="#">KX779086.1</a> |
| ✓ | <a href="#">Ehnedra intermedia var. tibetica voucher YC0710MT04 internal transcribed spacer 2, partial sequence</a>                         | 46.1      | 46.1        | 100%        | 0.018   | 100.00%    | 251      | <a href="#">KX779085.1</a> |
| ✓ | <a href="#">Ehnedra distachya voucher YC0709MT01 internal transcribed spacer 2, partial sequence</a>                                        | 46.1      | 46.1        | 100%        | 0.018   | 100.00%    | 251      | <a href="#">KX779084.1</a> |
| ✓ | <a href="#">Ehnedra lomatolepis voucher YC0714MT01 internal transcribed spacer 2, partial sequence</a>                                      | 46.1      | 46.1        | 100%        | 0.018   | 100.00%    | 251      | <a href="#">KX779083.1</a> |
| ✓ | <a href="#">Ehnedra sinica voucher (S) CR610h 18S ribosomal RNA gene, partial sequence; internal transcribed spacer 1, 5.8S ribos...</a>    | 46.1      | 46.1        | 100%        | 0.018   | 100.00%    | 1676     | <a href="#">AY755749.1</a> |
| ✓ | <a href="#">Ehnedra frustillata voucher (K) 10218 18S ribosomal RNA gene, partial sequence; internal transcribed spacer 1, 5.8S ribo...</a> | 46.1      | 46.1        | 100%        | 0.018   | 100.00%    | 1659     | <a href="#">AY755748.1</a> |
| ✓ | <a href="#">Ehnedra sinica voucher (K) 10143 18S ribosomal RNA gene, partial sequence; internal transcribed spacer 1, 5.8S riboso...</a>    | 46.1      | 46.1        | 100%        | 0.018   | 100.00%    | 1677     | <a href="#">AY755747.1</a> |
| ✓ | <a href="#">Ehnedra monosperma voucher (K) 10142 18S ribosomal RNA gene, partial sequence; internal transcribed spacer 1, 5.8S...</a>       | 46.1      | 46.1        | 100%        | 0.018   | 100.00%    | 1677     | <a href="#">AY755746.1</a> |
| ✓ | <a href="#">Ehnedra gerardiana voucher (K) 10141 18S ribosomal RNA gene, partial sequence; internal transcribed spacer 1, 5.8S ri...</a>    | 46.1      | 46.1        | 100%        | 0.018   | 100.00%    | 1658     | <a href="#">AY755745.1</a> |
| ✓ | <a href="#">Ehnedra frustillata voucher (S) 04-482 18S ribosomal RNA gene, partial sequence; internal transcribed spacer 1, 5.8S rib...</a> | 46.1      | 46.1        | 100%        | 0.018   | 100.00%    | 1659     | <a href="#">AY755743.1</a> |
| ✓ | <a href="#">Ehnedra minuta voucher (S) 03-930 18S ribosomal RNA gene, partial sequence; internal transcribed spacer 1, 5.8S ribos...</a>    | 46.1      | 46.1        | 100%        | 0.018   | 100.00%    | 1662     | <a href="#">AY755742.1</a> |
| ✓ | <a href="#">Ehnedra intermedia voucher (S) 03-925 18S ribosomal RNA gene, partial sequence; internal transcribed spacer 1, 5.8S ri...</a>   | 46.1      | 46.1        | 100%        | 0.018   | 100.00%    | 1677     | <a href="#">AY755741.1</a> |
| ✓ | <a href="#">Ehnedra equisetina voucher (S) 03-928 18S ribosomal RNA gene, partial sequence; internal transcribed spacer 1, 5.8S ri...</a>   | 46.1      | 46.1        | 100%        | 0.018   | 100.00%    | 1659     | <a href="#">AY755740.1</a> |
| ✓ | <a href="#">Ehnedra likiangensis voucher (S) 03-926 18S ribosomal RNA gene, partial sequence; internal transcribed spacer 1, 5.8S...</a>    | 46.1      | 46.1        | 100%        | 0.018   | 100.00%    | 1662     | <a href="#">AY755739.1</a> |
| ✓ | <a href="#">Ehnedra rhytidosperma 18S ribosomal RNA gene, partial sequence; internal transcribed spacer 1, 5.8S ribosomal RNA g...</a>      | 46.1      | 46.1        | 100%        | 0.018   | 100.00%    | 1590     | <a href="#">DQ028782.2</a> |
| ✓ | <a href="#">Ehnedra przewalskii voucher Kamp03071110 internal transcribed spacer 2, partial sequence</a>                                    | 46.1      | 46.1        | 100%        | 0.018   | 100.00%    | 246      | <a href="#">AY730605.1</a> |
| ✓ | <a href="#">Brevibacterium sp. c2 chromosome, complete genome</a>                                                                           | 42.1      | 140         | 91%         | 0.27    | 100.00%    | 4253182  | <a href="#">CP050154.1</a> |
| ✓ | <a href="#">Colchicum chlorobasis voucher C4225 internal transcribed spacer 1 and 5.8S ribosomal RNA gene, partial sequence</a>             | 42.1      | 42.1        | 91%         | 0.27    | 100.00%    | 202      | <a href="#">MF596365.1</a> |
| ✓ | <a href="#">Brevibacterium aurantiacum strain SMQ-1419 chromosome, complete genome</a>                                                      | 42.1      | 42.1        | 91%         | 0.27    | 100.00%    | 4038634  | <a href="#">CP025333.1</a> |
| ✓ | <a href="#">Brevibacterium aurantiacum strain SMQ-1421 chromosome, complete genome</a>                                                      | 42.1      | 74.3        | 91%         | 0.27    | 100.00%    | 4085228  | <a href="#">CP025332.1</a> |
| ✓ | <a href="#">Brevibacterium aurantiacum strain SMQ-1418 chromosome, complete genome</a>                                                      | 42.1      | 42.1        | 91%         | 0.27    | 100.00%    | 4193206  | <a href="#">CP025331.1</a> |
| ✓ | <a href="#">Brevibacterium aurantiacum strain SMQ-1420 chromosome, complete genome</a>                                                      | 42.1      | 74.3        | 91%         | 0.27    | 100.00%    | 4328723  | <a href="#">CP025334.1</a> |
| ✓ | <a href="#">Brevibacterium aurantiacum strain SMQ-1417 chromosome, complete genome</a>                                                      | 42.1      | 74.3        | 91%         | 0.27    | 100.00%    | 4424341  | <a href="#">CP025330.1</a> |
| ✓ | <a href="#">Deinococcus actinosclerulus strain SJTR chromosome, complete genome</a>                                                         | 42.1      | 42.1        | 91%         | 0.27    | 100.00%    | 3315586  | <a href="#">CP029774.1</a> |
| ✓ | <a href="#">Streptomyces sp. TLI_053 genome assembly, chromosome, I</a>                                                                     | 42.1      | 307         | 95%         | 0.27    | 100.00%    | 9900053  | <a href="#">LT629775.1</a> |
| ✓ | <a href="#">Brevibacterium aurantiacum strain SMQ-1335 chromosome, complete genome</a>                                                      | 42.1      | 74.3        | 91%         | 0.27    | 100.00%    | 4209935  | <a href="#">CP017150.1</a> |
| ✓ | <a href="#">Curtobacterium sp. YC1 chromosome, complete genome</a>                                                                          | 42.1      | 42.1        | 91%         | 0.27    | 100.00%    | 3301309  | <a href="#">CP066341.1</a> |
